# Supplementary material for: NO-disproportionation, promoted by Pd-cluster: formation and X-ray structure of Pd8(µ-CO)4(µ-OOCCMe3)8[µ-N(O)O–]4
Source: Royal Society of Chemistry journal article supplement (doi:10.1039/b710230e), 2007-01-01
Supplement: b710230e.pdf [file b710230e.pdf]

**Concerning  $\text{Pd}_4(\mu\text{-NO}_2)_4(\mu\text{-OCOCMe}_3)_4$ :** Our assumption about stoichiometry and structure is based on the following. In reaction of  $\text{Pd}_6(\mu\text{-CO})_6(\mu\text{-OCOBu}^i)_6$  possessed the structure similar to  $\text{Pd}_6(\mu\text{-CO})_6(\mu\text{-OCOCMe}_3)_6$  we were able to isolate the complex with analysis: C 23.80, H 2.31, N 5.55%; calc. for  $\text{Pd}_n(\text{NO}_2)_n(\text{OCOBu}^i)_n$ : C 23.68, H 3.55, N 5.52%. IR-spectra of this compound contains bands 1620, 1556, 1408, 1328, 1160  $\text{cm}^{-1}$  and doesn't contain band in the area 1900-2100  $\text{cm}^{-1}$ . So this compound contains bridging  $\text{NO}_2$  and RCOO ligands and doesn't contain CO-ligands. The total composition, ligands ratio and their coordination with that fact, that other product in reaction of similar compound  $\text{Pd}_6(\mu\text{-CO})_6(\mu\text{-OCOCMe}_3)_6$  with NO contains two 4-nuclear fragments of initial 6-nuclear cluster, made us assume the structure, which is described in article. This assumption is in a good agreement with analysis for compounds mixture. Synthesis of mixture  $\text{Pd}_8(\text{NO}_2)_4(\text{CO})_4(\text{OCOCMe}_3)_8$  and  $\text{Pd}_4(\text{NO}_2)_4(\text{OCOR})_4$  was reproduced more than 10 times. And for every case we had the good elemental analysis under the hypothesis about equimolar mixture.

**Concerning analysis of gas phase:** The gas phase was analyzed for the presence of CO,  $\text{CO}_2$ ,  $\text{N}_2$ ,  $\text{N}_2\text{O}$ . Absolute quantities of gases after 72 hours are the following: 6.8-7.2 ml  $\text{CO}_2$  (0.15-0.16 mole/1 mole Pd), 1.4-1.6 ml  $\text{N}_2\text{O}$  (0.03-0.035 mole/1 mole Pd), 50-60 ml  $\text{N}_2$  (1.1-1.3 mole/1mole Pd). No traces of CO were detected. Thus, the contribution of first reaction in total reaction of coordinated CO oxidation is about 20% and the contribution of second reaction is about 80% respectively. In that case amount of  $\text{N}_2$  formed in second reaction must be about 0.06 mol/1 mol Pd while really it ranges from 1.1 to 1.3 mol/1 mol Pd. One can assume that the excess of  $\text{N}_2$  formed in reaction:  $4\text{NO} = \text{N}_2 + \text{NO}_2$  catalyzed by palladium clusters. The formal number of catalytic cycles equals 7-8. The results have a good reproducibility – about 10% for reactions of CO oxidation and 15% for NO disproportionation.
